# Supplementary material
Source: Springer Nature journal article supplement (https://www.springermedizin.de/resource/supplementary/13002_2013_408_MOESM1_ESM.pdf/9626842)

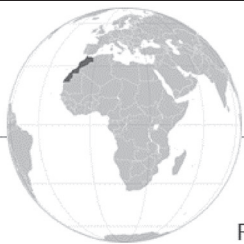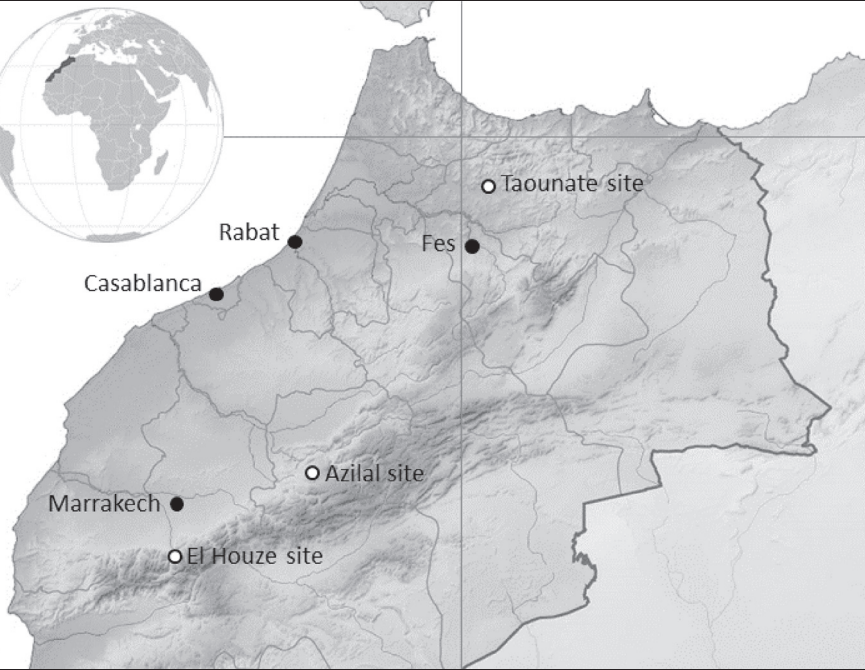

Casablanca

Rabat

Marrakech

Fes

Taounate site

Azilal site

El Houze site

Supplement: MOESM1 [file 9626842]
